# Supplementary material for: Profiling Antibiotic Susceptibility among Distinct Enterococcus faecalis Isolates from Dental Root Canals
Source: MDPI journal article supplement (doi:10.3390/antibiotics13010018), 2023-12-24
Supplement: s1 [file s1]

**Supplementary Table S1:** MIC values of six antibiotics (amoxicillin, clindamycin, vancomycin, tigecycline, linezolid, and daptomycin) against various *E. faecalis* isolates.

|                    | Amoxicillin<br>(µg/ml) | Vancomycin<br>(µg/ml) | Clindamycin<br>(µg/ml) | Tigecycline<br>(µg/ml) | Linezolid<br>(µg/ml) | Daptomycin<br>(µg/ml) |
|--------------------|------------------------|-----------------------|------------------------|------------------------|----------------------|-----------------------|
| MIC<br>breakpoints | ≤4                     | ≤4                    | N/A                    | ≤0.25                  | ≤4                   | ≤4                    |
| ATCC 29212         | 1                      | 3                     | 6                      | 0.19                   | 2                    | 2                     |
| A1                 | 1                      | ≥256                  | ≥256                   | 0.38                   | 2                    | 1                     |
| A2                 | 0.75                   | ≥256                  | ≥256                   | 0.38                   | 2                    | 0.75                  |
| UmID1              | 1.5                    | 1.5                   | 8                      | 0.19                   | 3                    | 1                     |
| UmID2              | 2                      | 1.5                   | ≥256                   | 0.25                   | 1.5                  | 1.5                   |
| UmID3              | 1.5                    | 1.5                   | 4                      | 0.19                   | 2                    | 0.75                  |
| UmID4              | 1                      | 2                     | 12                     | 0.25                   | 2                    | 1.5                   |
| UmID5              | 0.75                   | 3                     | 24                     | 0.25                   | 2                    | 2                     |
| UmID7              | 0.75                   | 2                     | 4                      | 0.19                   | 3                    | 3                     |
| UmID10             | 1                      | 3                     | 24                     | 0.25                   | 2                    | 3                     |
| UmID11             | 1                      | 2                     | ≥256                   | 0.125                  | 1.5                  | 0.75                  |
| UmID12             | 0.5                    | 2                     | 3                      | /                      | /                    | /                     |
| UmID13             | 1                      | 3                     | 32                     | 0.19                   | 3                    | 2                     |
| UmID15             | 0.75                   | 2                     | 8                      | 0.125                  | 3                    | 0.75                  |
| UmID17             | 0.75                   | 3                     | 32                     | 0.19                   | 3                    | 3                     |
| UmID18             | 0.75                   | 2                     | 3                      | /                      | /                    | /                     |
| UmID23             | 1                      | 4                     | 24                     | 0.19                   | 3                    | 3                     |
| UmID24             | 0.75                   | 1                     | 4                      | /                      | /                    | /                     |
| UmID27             | 1                      | 3                     | ≥256                   | 0.25                   | 2                    | 1                     |
| UmID30             | 0.5                    | 1.5                   | 24                     | 0.25                   | 2                    | 1                     |
| UmID31             | 1                      | 3                     | 16                     | 0.25                   | 3                    | 1.5                   |
| UmID33             | 1                      | 2                     | ≥256                   | 0.19                   | 1.5                  | 1                     |
| UmID34             | 0.75                   | 1                     | 3                      | /                      | /                    | /                     |
| UmID35             | 1                      | 1                     | 4                      | /                      | /                    | /                     |
| UmID37             | 0.75                   | 1.5                   | 2                      | /                      | /                    | /                     |
| UmID40             | 1                      | 1                     | 24                     | 0.094                  | 2                    | 0.75                  |
| UmID42             | 1.5                    | 2                     | 8                      | 0.125                  | 2                    | 1                     |
| UmID43             | 1.5                    | 3                     | 12                     | 0.125                  | 3                    | 1.5                   |
| UmID44             | 1.5                    | 1                     | 16                     | 0.094                  | 2                    | 1.5                   |
| UmID46             | 1.5                    | 3                     | 32                     | 0.125                  | 3                    | 3                     |
| UmID47             | 1                      | 3                     | 32                     | 0.125                  | 3                    | 1                     |
| UmID49             | 1.5                    | 3                     | 12                     | 0.094                  | 3                    | 2                     |
| UmID51             | 1.5                    | 3                     | 12                     | 0.19                   | 4                    | 1                     |
| UmID53             | 1.5                    | 3                     | 8                      | 0.125                  | 3                    | 2                     |
| UmID54             | 1.5                    | 3                     | 24                     | 0.125                  | 2                    | 0.75                  |
| UmID55             | 1                      | 1                     | 1.5                    | /                      | /                    | /                     |
| UmID56             | 1                      | 4                     | 24                     | 0.064                  | 3                    | 1                     |

**Light red:** denotes resistant MICs above the breakpoint. **Orange:** denotes isolates exhibiting clindamycin MICs above that of the ATCC 29212 reference strain. **Grey:** denotes MICs that match the breakpoint for the respective antibiotic, and that could be considered “I – Susceptible, increased exposure” by the EUCAST.
